# Supplementary material
Source: publisher figshare collection journal article supplement (https://acs.figshare.com/ndownloader/files/7935247)
Supplement: Supplementary file 1 [file 7935247]

## Supporting Information

# Functional Paper-based Platform for Rapid Capture and Detection of CeO<sub>2</sub> Nanoparticles

Ali Othman,<sup>a</sup> Daniel Andreescu,<sup>a</sup> Dinusha P. Karunaratne,<sup>a</sup> S. V. Babu<sup>b,c</sup>, and Silvana Andreescu<sup>\*ab</sup>

<sup>a</sup> Department of Chemistry and Biomolecular Science, Clarkson University, Potsdam, New York 13699-5810, USA. E-mail: eandrees@clarkson.edu; Fax: +(315) 268 6610; Tel: +(315) 268 2394

<sup>b</sup> Department of Chemical and Biomolecular Engineering, Clarkson University, Potsdam, New York 13699, USA

<sup>c</sup> Center for Advanced Materials Processing, Clarkson University, Potsdam, New York 13699, USA

**Nanoparticle Concentration Calculation (NP/mL).** The number of nanoparticles ( $N_{np}$ ) per mL was estimated based on the particle size distribution analysis, assuming a spherical particle with a volume ( $V_{np}$ ) of  $\frac{4}{3}\pi r^3$  where  $r$  is the average radius of the NPs as determined by DLS measurements (17.6 nm). The weight of a single particle ( $W_{np}$ ) was calculated by considering the density of CeO<sub>2</sub> NPs ( $D_{np}$ ) to be equivalent to that of the bulk phase (e.g., 7.65 g/mL)<sup>1-2</sup>. For example, the volume of CeO<sub>2</sub> NPs with an average diameter of 17.6 nm is  $2.85 \times 10^{-18}$  mL and the  $W_{np}$  is  $2.2 \times 10^{-17}$  g per particle. Using this data and the concentration of CeO<sub>2</sub> NPs in colloidal solution in  $\mu\text{g/mL}$  we find the  $N_{np}$  of  $2.3 \times 10^{11}$  NP/mL for a solution of 5 ppm. For all types of particles, the NPs/mL concentrations were calculated according with their size.

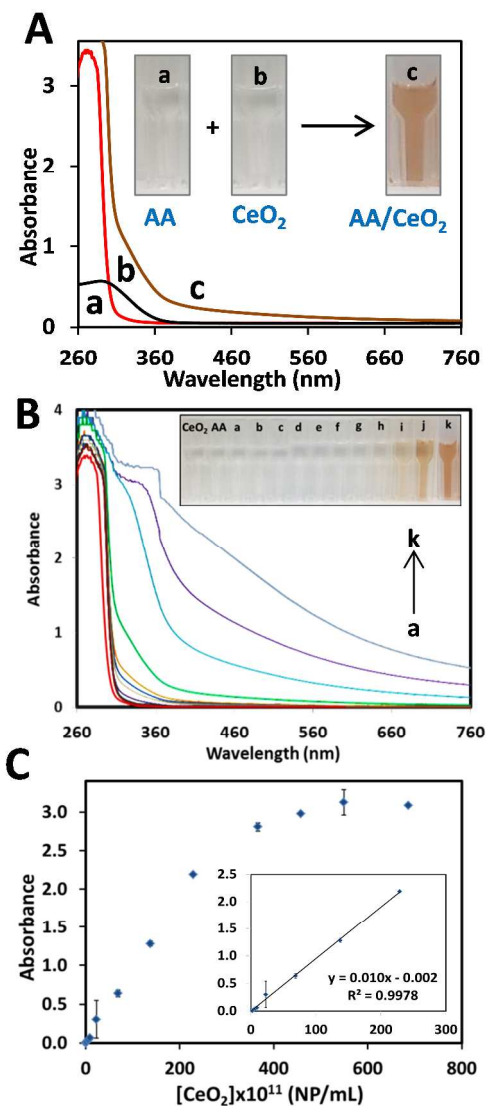

**Figure S1.** (A) Spectroscopic responses and UV-Vis spectra of ascorbic acid (AA), at 5 mM and pH 3.0, in the absence and presence of CeO<sub>2</sub> NPs dispersion. (B) and (C). Concentration dependent spectral changes with increasing the NPs concentration (from a to k: (0.46, 0.57, 1.14, 2.28, 4.6, 6.9, 9.2, 22.9, 68.7, 137.4 and 229)  $\times 10^{11}$  NP/mL)) and the corresponding calibration curve and linear range recorded at  $\lambda_{max} = 435$  nm. Error bars represent standard deviations for  $n = 3$  measurements.

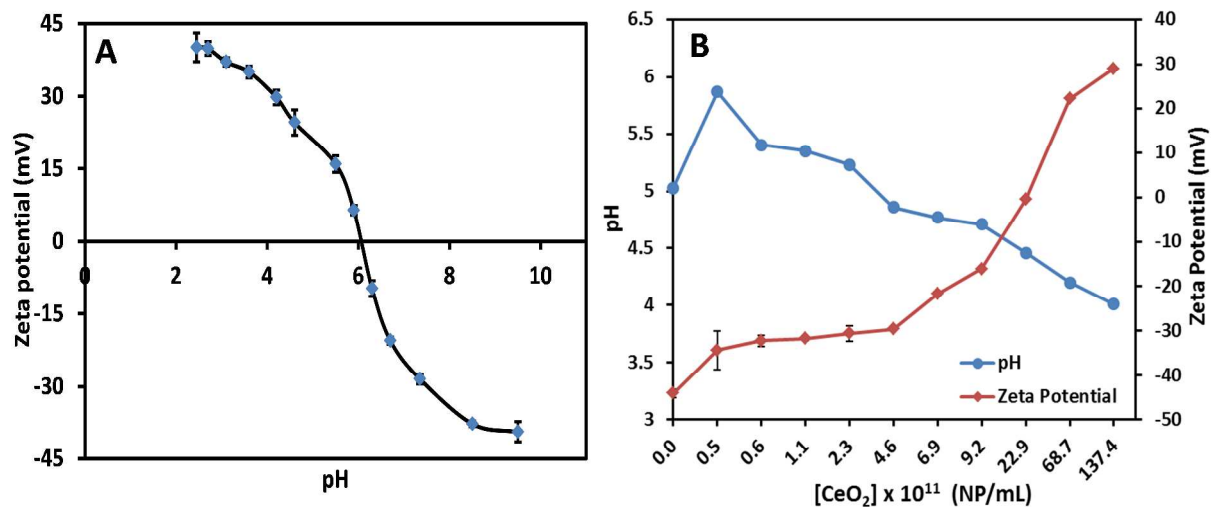

**Figure S2. A)** Zeta-potential ( $\xi$ ) of the CeO<sub>2</sub> NPs suspension ( $1.4 \times 10^{13}$  NP/mL) versus pH, **B)** Changes in pH and surface charge ( $\xi$ ) as a function of CeO<sub>2</sub> NPs concentration in the presence of catechol (5 mM, pH 5), ( $n=5$ ).

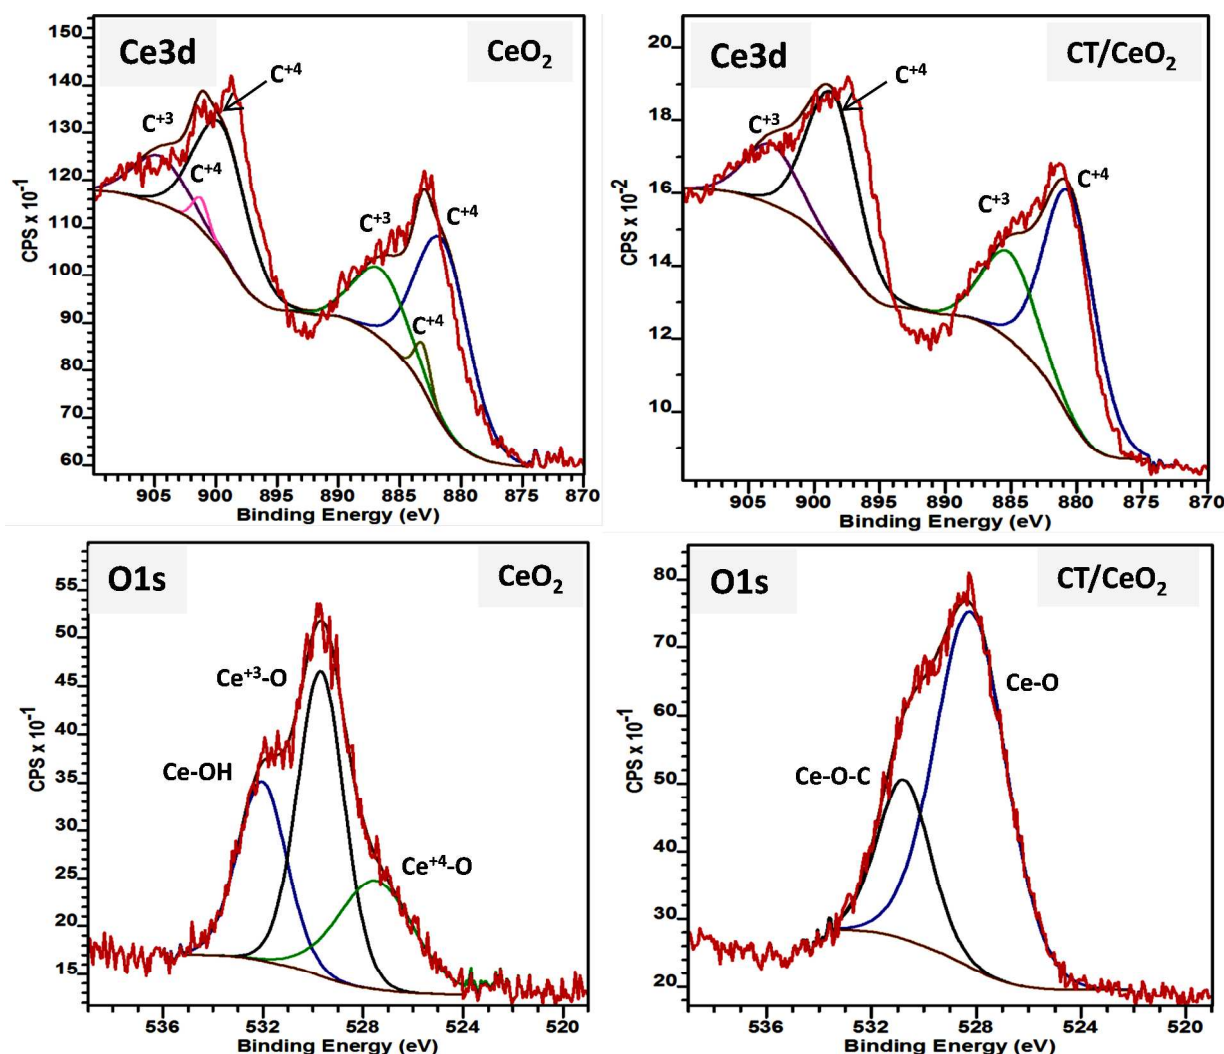

**Figure S3.** Ce3d and O1s XPS spectra of CeO<sub>2</sub> NPs and CT/CeO<sub>2</sub> NPs.

**Table S1:** XPS data resulting from the fitting of the Ce 3d spectra of CeO<sub>2</sub> NPs and CT/CeO<sub>2</sub> NPs.

| Sample             | CeO <sub>2</sub> |       |       |        |       | CT/CeO <sub>2</sub> |       |       |        |        |       |       |
|--------------------|------------------|-------|-------|--------|-------|---------------------|-------|-------|--------|--------|-------|-------|
| Peak Position (eV) | 881.5            | 883.1 | 886.6 | 899.6  | 901.2 | 904.6               | 880.5 | 880.8 | 885.1  | 898.6  | 898.9 | 903.4 |
| Peak Area          | 2107.7           | 152.4 | 791.9 | 1459.6 | 105.5 | 548.4               | 3076  | 0.0   | 1198.2 | 2130.2 | 0.0   | 829.8 |

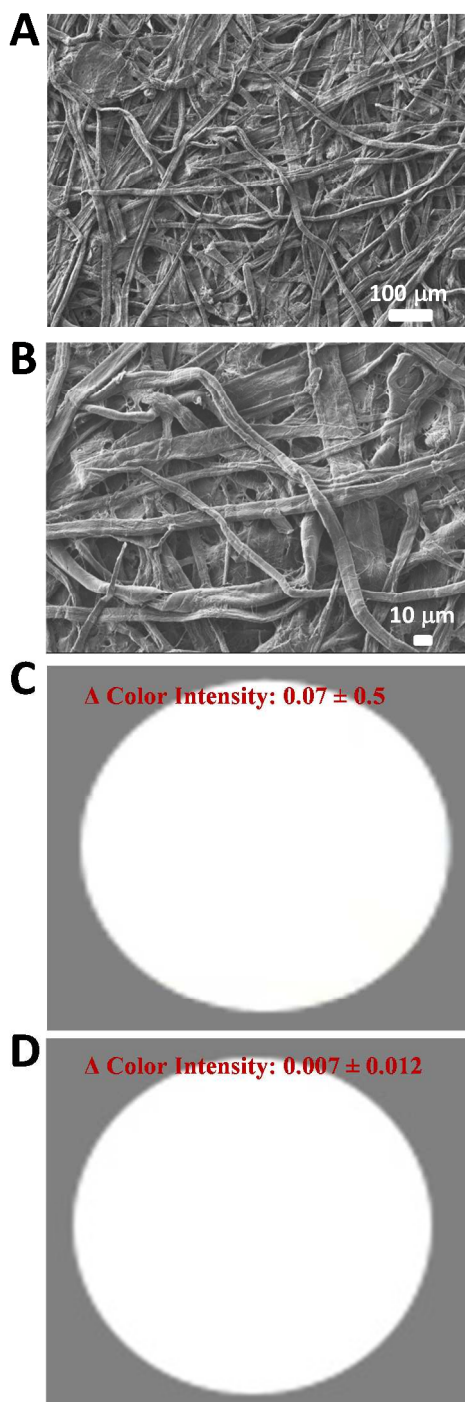

**Figure S4.** SEM images of the control non-functionalized paper after exposure to CeO<sub>2</sub> NPs ( $9.2 \times 10^{13}$  NP/mL) at a magnification of 100 μm (A) and 10 μm (B). C. Color response of the filter paper after exposure to CeO<sub>2</sub> NPs ( $9.2 \times 10^{13}$  NP/mL). D. Color response of bare paper disc.

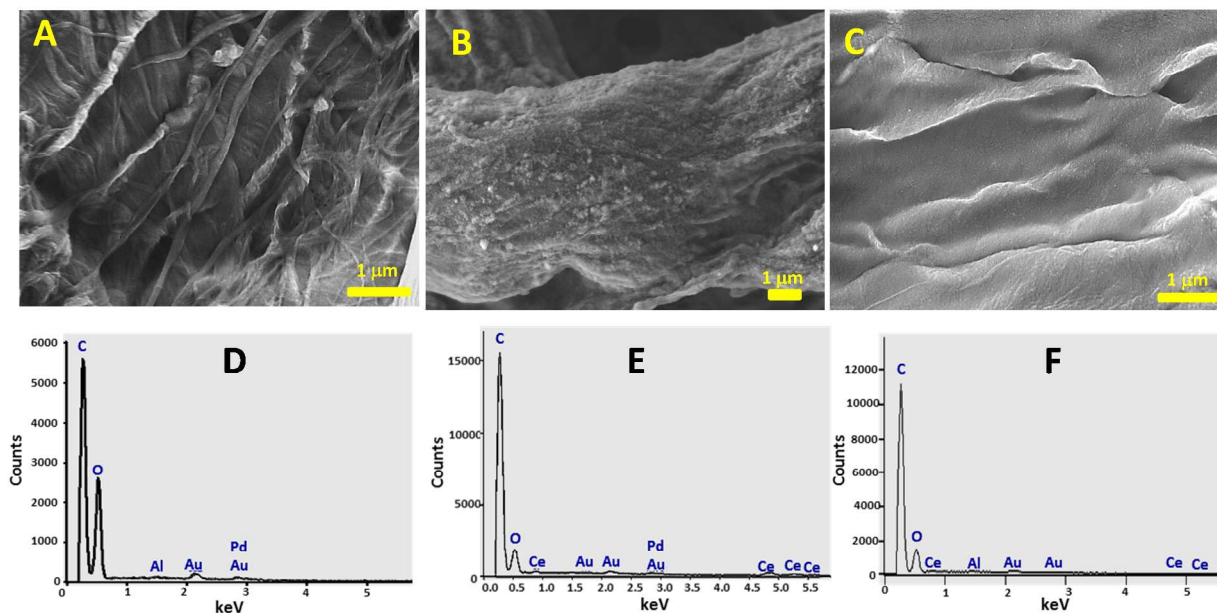

**Figure S5.** SEM images of the cellulosic paper filter after ligand grafting (A) and after exposure to  $\text{CeO}_2$  NPs ( $9.2 \times 10^{13}$  NP/mL) (B). SEM image of the paper filter without ligand grafting (catechol) after exposure to  $\text{CeO}_2$  NP ( $9.2 \times 10^{13}$  NP/mL) (C). D, E and F: corresponding EDX analysis of A, B, and C samples, respectively.

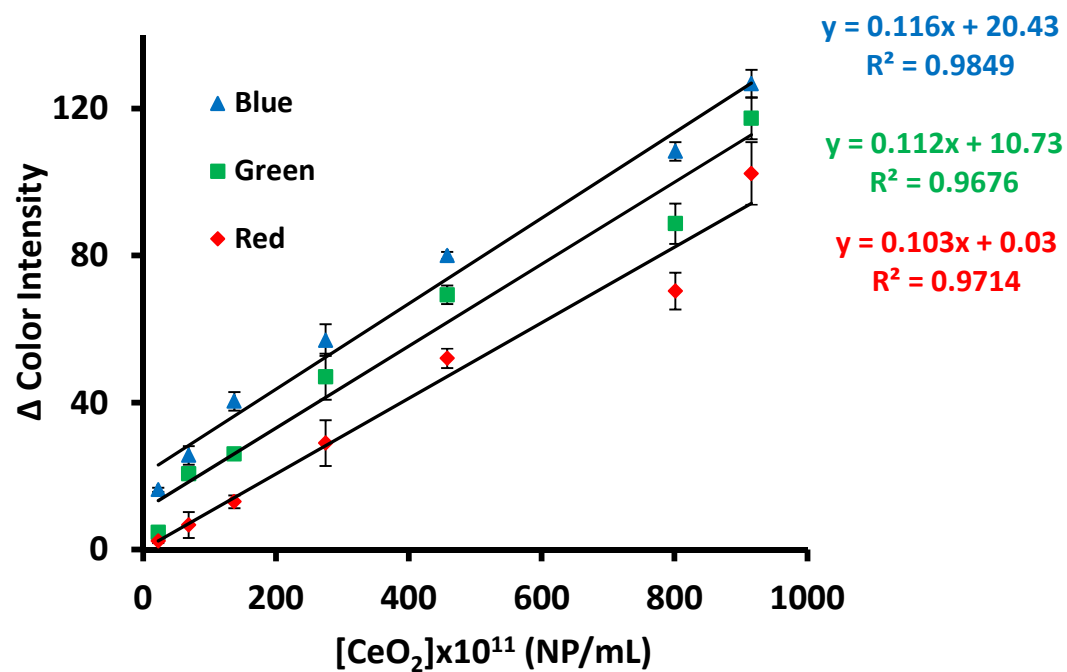

**Figure S6:** Quantified color intensity of catechol-grafted paper upon exposure to different concentrations of  $\text{CeO}_2$  NPs using different RGB color channels (blue, green, and red).



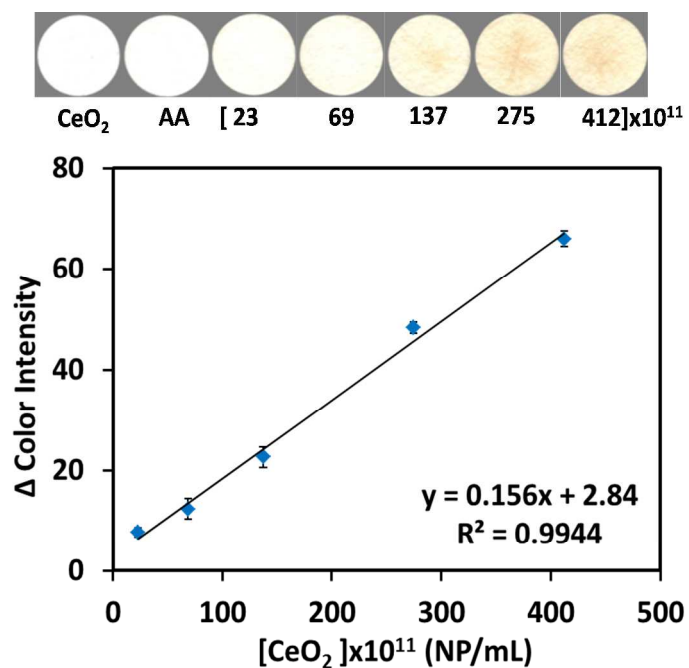

**Figure S7.** Colorimetric responses of AA-grafted paper for upon exposure to different concentrations of CeO<sub>2</sub> NPs and their corresponding calibration curve of the  $\Delta$  color intensity (average responses and standard deviation for  $n = 3$ ).

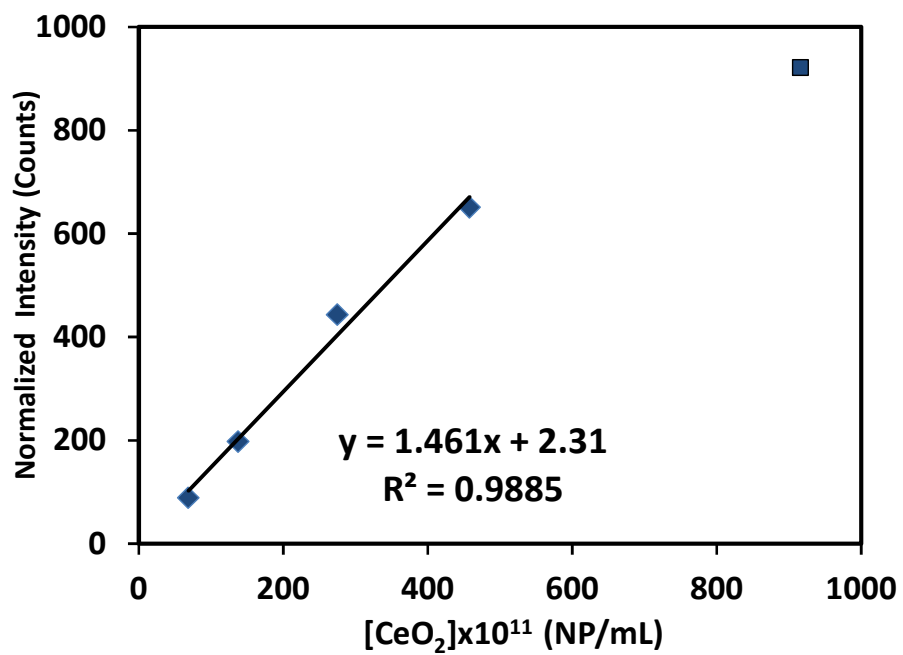

**Figure S8.** XRF calibration curve of catechol-grafted cellulosic paper upon exposure to increasing CeO<sub>2</sub> NPs concentrations.

**Table S2:** Characteristics of CeO<sub>2</sub> NPs with different types of surface coating

| Sample | Source                   | Surface modification                           | Nature of NPs                                                                 | NPs Size (nm) |
|--------|--------------------------|------------------------------------------------|-------------------------------------------------------------------------------|---------------|
| A      | Synthesized <sup>a</sup> | Polyacrylic acid-Oleylamine (PAA-OA) copolymer | Colloidal, 10 % dispersion in 0.1 M Na <sub>2</sub> CO <sub>3</sub> , high pH | < 10          |
| B      | Commercial modified      | No information Sigma-Aldrich, #544841          | nanopowder, washed and dried at 105 °C                                        | < 25          |
| C      | Synthesized <sup>b</sup> | Citric acid                                    | nanopowder                                                                    | < 10          |
| D      | Synthesized <sup>c</sup> | Glycine                                        | nanopowder                                                                    | 20-40         |
| E      | Synthesized              | PAA-OA calcined at 300 °C                      | nanopowder                                                                    | < 10          |

<sup>a</sup> Synthesized following a procedure of synthesis of crystalline ceria *via* thermal decomposition of cerium precursors .

<sup>b</sup> Synthesized following a procedure of synthesis of ceria-modified- *via* thermohydrolysis of an acidic solution of cerium-IV nitrate salt Ce(NO<sub>3</sub>)<sub>4</sub> at high temperature.

<sup>c</sup> Synthesized following a procedure of surface modification of ceria nanoparticles.

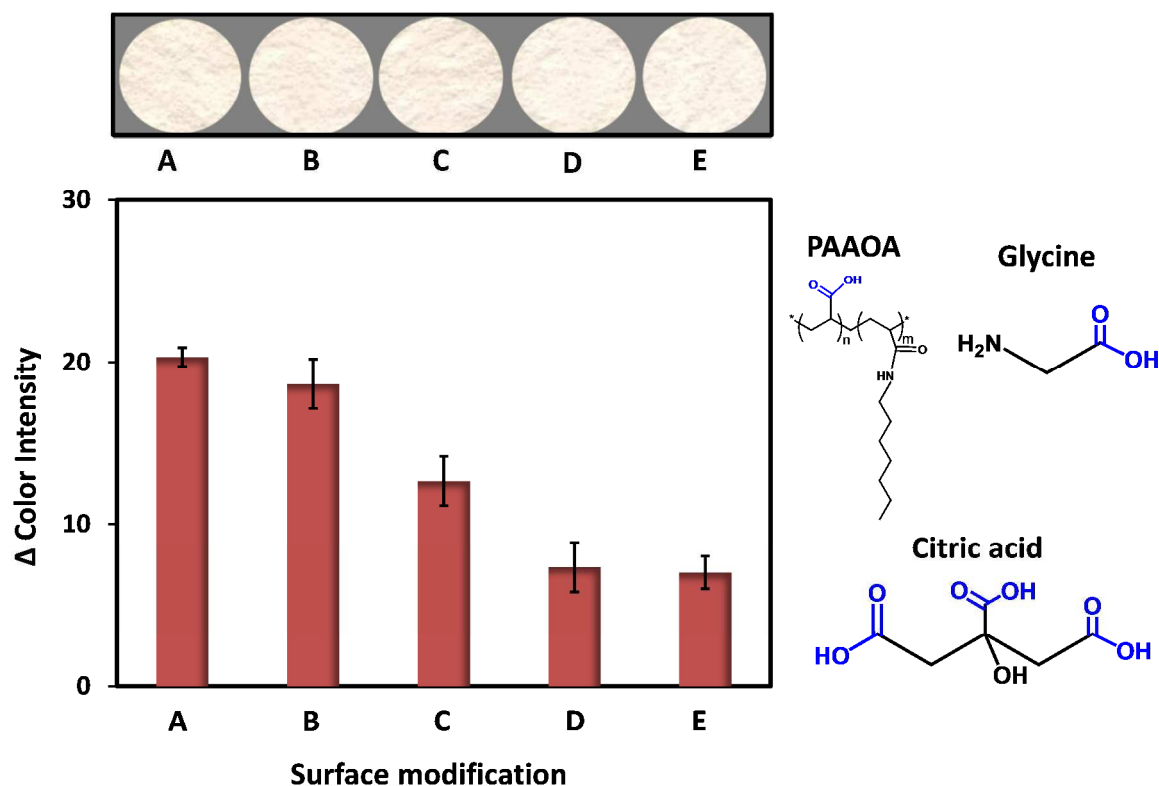

**Figure S9.** Colorimetric responses of paper sensors upon addition of CeO<sub>2</sub> NPs dispersions ( $9.2 \times 10^{13}$  NP/mL) with different coating agents to the catechol functionalized filter; **A)** Polyacrylic acid-Oleylamine (PAA-OA), **B)** CeO<sub>2</sub> NPs <25 nm (nanopowder), washed and dried at 105 °C, **C)** Citric acid, **D)** Glycine, **E)** Polyacrylic acid-Oleylamine (PAA-OA) modified.

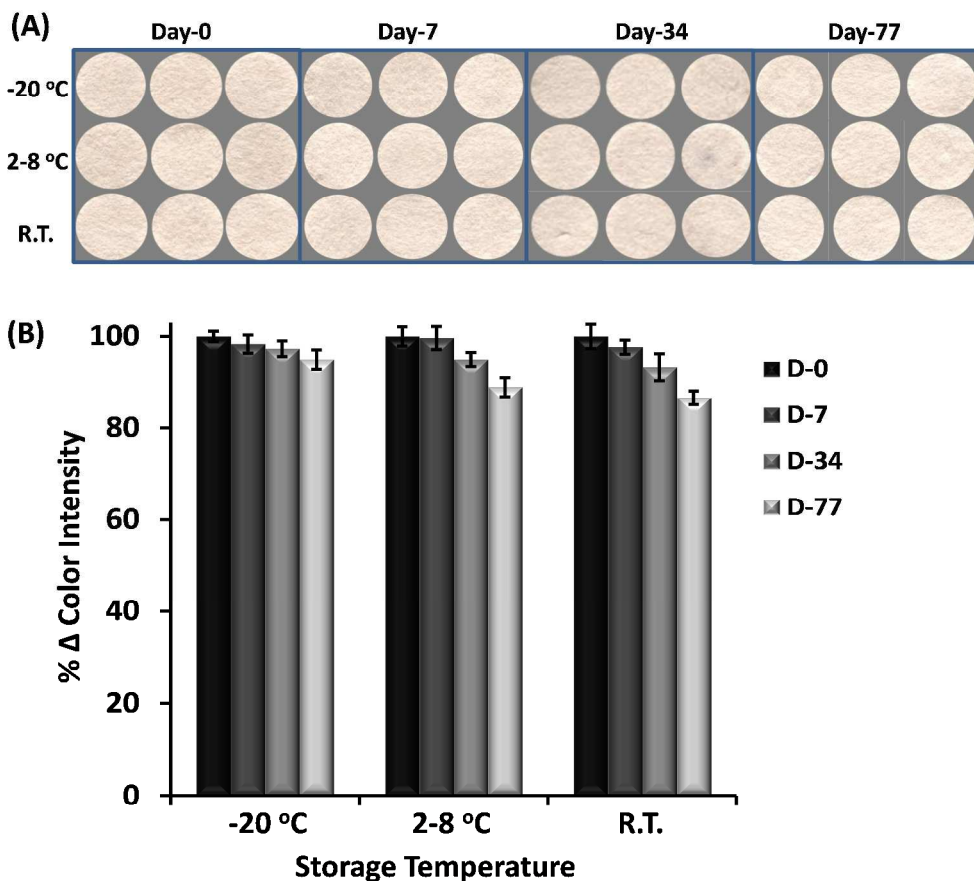

**Figure S10.** *A)* Storage stability of the catechol-functionalized filters quantified by the color change upon exposure to NPs upon storage in three different conditions: room temperature ( $\sim 25$  °C), refrigerator (2-8 °C) and freezer ( $\sim -20$  °C). Responses are quantified as the color intensity of the paper disks after addition of  $\text{CeO}_2$  NPs ( $68.7 \times 10^{11}$  NP/mL), ( $n = 3$ ). *B)* Histograms showing % decrease of response (with day 0 corresponding to 100%).

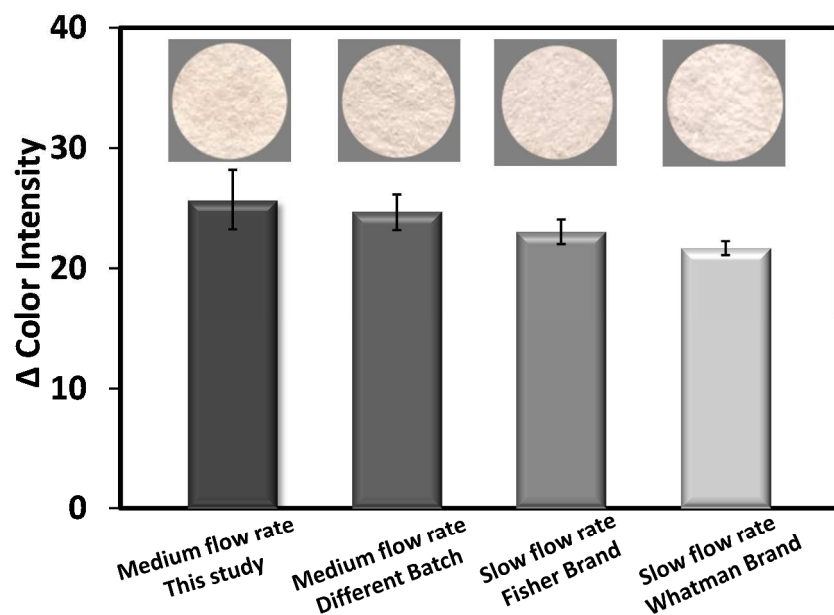

**Figure S11.** Colorimetric response of different types of cellulosic filter papers functionalized with catechol upon exposure to the same concentration of  $\text{CeO}_2$  NPs ( $68.7 \times 10^{11}$  NP/mL). From left to right: filter papers with medium flow rate used in this study (the first two columns show paper from different batches), and filter papers with slow flow rate from Fisher Scientific and Whatman brands, respectively, ( $n=3$ ).

**Table S3:** Characteristics of different types of metal oxides tested in the selectivity study.

| Particles                      | Nature of NPs                                | NPs Size (nm) |
|--------------------------------|----------------------------------------------|---------------|
| TiO <sub>2</sub>               | nanopowder                                   | 10-30         |
| Fe <sub>2</sub> O <sub>3</sub> | nanopowder                                   | 20-40         |
| ZrO <sub>2</sub>               | nanopowder                                   | 40            |
| Sb <sub>2</sub> O <sub>3</sub> | nanopowder                                   | 80-200        |
| ZnO                            | nanopowder                                   | 10-30         |
| SiO <sub>2</sub>               | Colloidal, 30 %<br>SiO <sub>2</sub> , acidic | 35            |
| CuO                            | nanopowder                                   | 40            |
| Al <sub>2</sub> O <sub>3</sub> | nanopowder                                   | 300           |

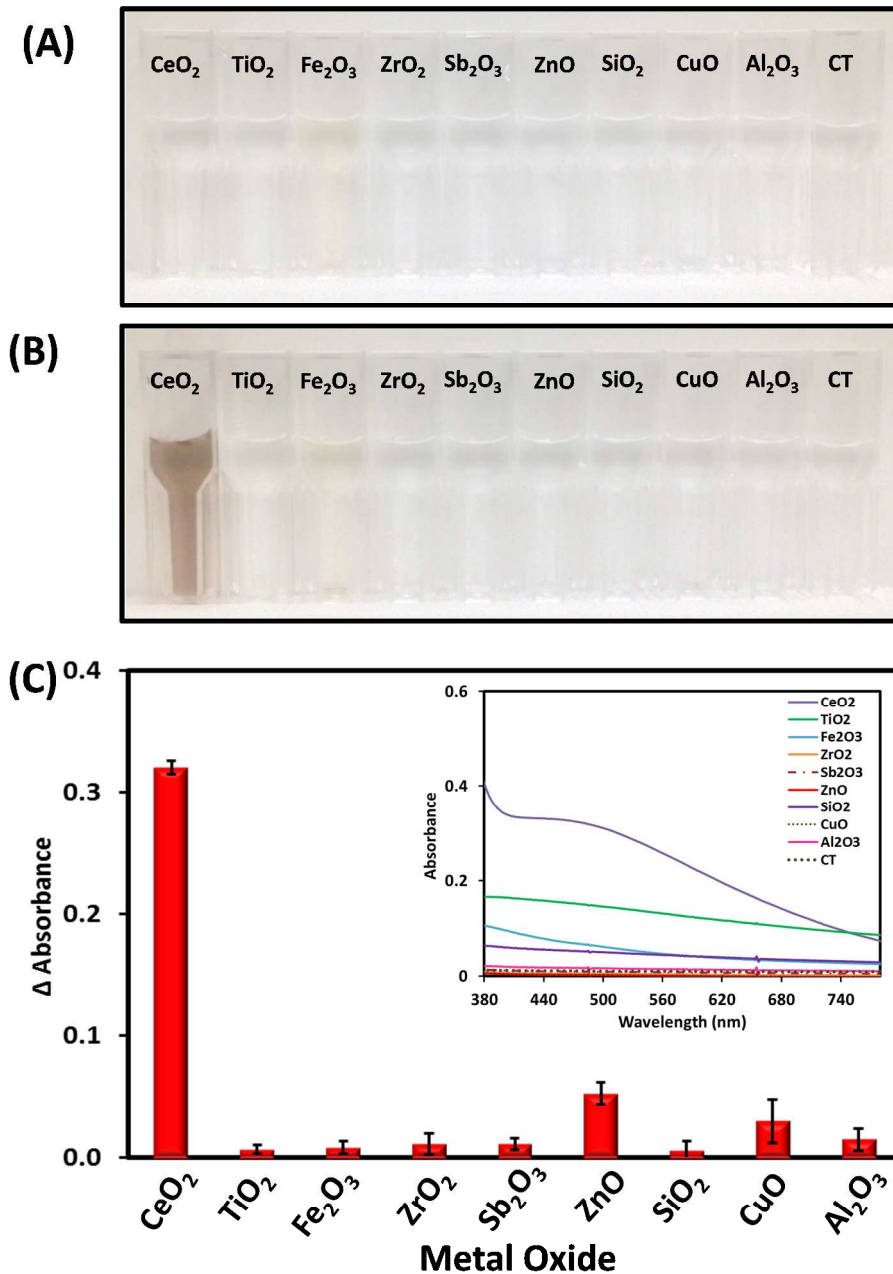

**Figure S12.** Colorimetric responses **A)** before and **B)** after addition of different types of metal oxide NP dispersions ( $68.7 \times 10^{11}$  NP/mL) to catechol solution (5 mM), and **C)** Comparative absorbance changes and corresponding UV-Vis spectra of catechol-metal oxide conjugates for the same NP concentration.

**Table S4:** Color codes of catechol-grafted filter papers upon exposure to different types of metal oxides. The color codes were obtained from Adobe Photoshop software.

| <b>Metal Oxide</b>                 | <b>Color Code No.</b> |
|------------------------------------|-----------------------|
| <b>CeO<sub>2</sub></b>             | F1DED5                |
| <b>TiO<sub>2</sub></b>             | FFFDF6                |
| <b>Fe<sub>2</sub>O<sub>3</sub></b> | F6F1EB                |
| <b>ZrO<sub>2</sub></b>             | FBFBF3                |
| <b>Sb<sub>2</sub>O<sub>3</sub></b> | FEFFFA                |
| <b>ZnO</b>                         | FCFBF5                |
| <b>SiO<sub>2</sub></b>             | F9F9EE                |
| <b>CuO</b>                         | FAF6ED                |
| <b>Al<sub>2</sub>O<sub>3</sub></b> | FDFDF1                |



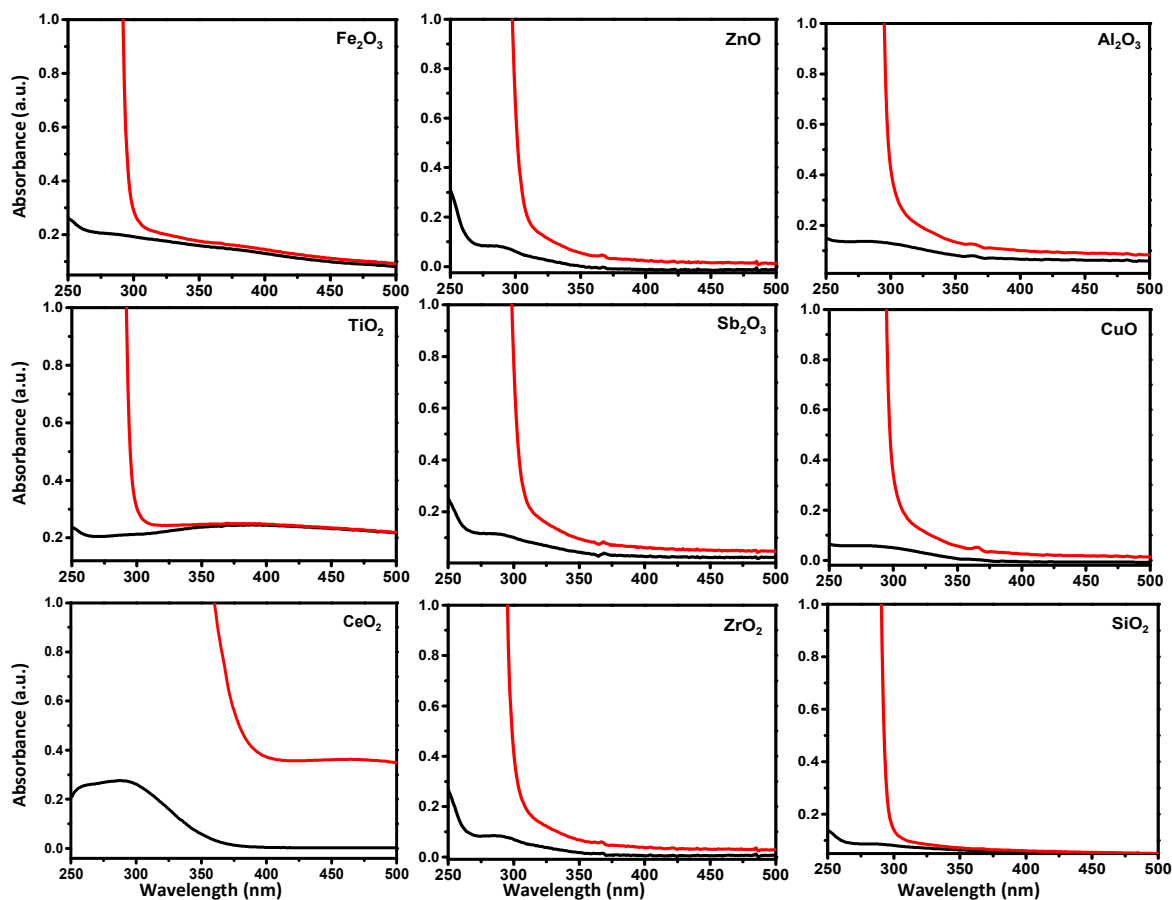

**Figure S13.** UV-Vis spectra of the varying metal oxide NPs at the same concentration tested in this work before (black) and after (red) reaction with catechol solution (5 mM, pH 5).

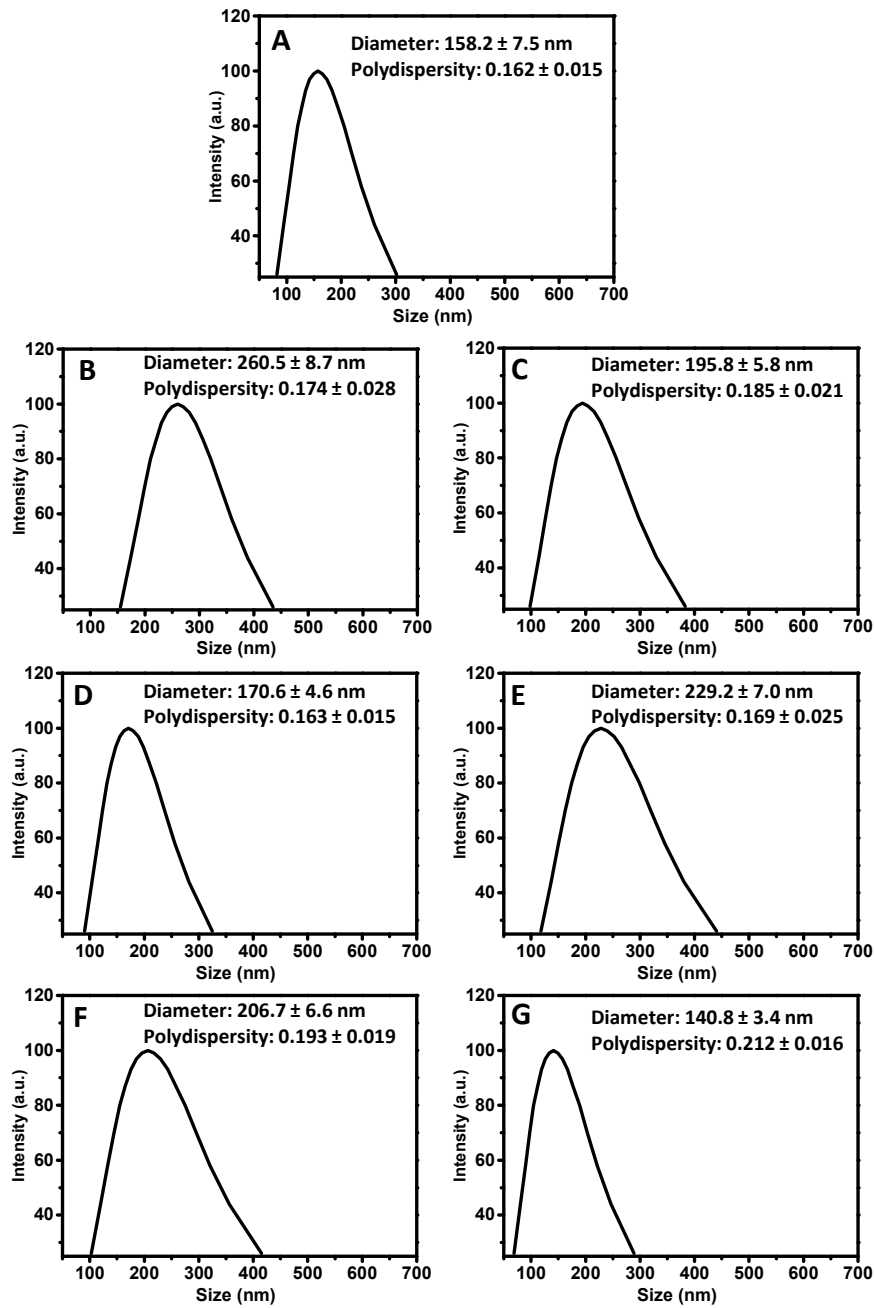

**Figure S14.** Size distribution data of (A) the abrasive  $\text{CeO}_2$  used for CMP polishing process (140 nm, supplied by Ferro Corp. (50 wt. %)). And data of waste samples collected from CMP polishing, from (B) to (G): CGS/SiN, CGS/SiO<sub>2</sub>, CPS/SiN, CPS/SiO<sub>2</sub>, C/SiO<sub>2</sub>: 3.125 wt %, and C/SiO<sub>2</sub>: 6.25 wt %, respectively.

**Table S5.** Comparison of measurement performance of the proposed platforms *versus* other NP-colorimetric detection methods reported in the literature.

| Ref.                   | LOD                         | LOQ                         | Response / Real sample                                                                                                                                                                                                                                                       | Linear ranges                                                                                                                                                                                                                                                                | Detection principle                                                                                                                                                                                            |
|------------------------|-----------------------------|-----------------------------|------------------------------------------------------------------------------------------------------------------------------------------------------------------------------------------------------------------------------------------------------------------------------|------------------------------------------------------------------------------------------------------------------------------------------------------------------------------------------------------------------------------------------------------------------------------|----------------------------------------------------------------------------------------------------------------------------------------------------------------------------------------------------------------|
| <b>This work</b>       | $0.36 \times 10^{11}$ NP/mL | $1.2 \times 10^{11}$ NP/mL  | Visual detection within seconds<br>Responds for CeO <sub>2</sub> as well to other oxides NPs such as TiO <sub>2</sub> , Fe <sub>2</sub> O <sub>3</sub> , Sb <sub>2</sub> O <sub>3</sub> , ZnO, ZrO <sub>2</sub> , CuO, SiO <sub>2</sub> , and Al <sub>2</sub> O <sub>3</sub> | CeO <sub>2</sub> NPs ranging from $(0.46 - 5.5) \times 10^{11}$ NP/mL<br>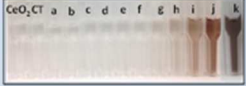                                                                                                                  | Ability of CeO <sub>2</sub> NPs to react selectively via oxidative and surface chelation processes with readily oxidizable ligands containing o-dihydroxy functionalities, such as catechol and ascorbic acid. |
| <b>This work</b>       | $14.9 \times 10^{11}$ NP/mL | $49.7 \times 10^{11}$ NP/mL | Responds for CeO <sub>2</sub> as well to other oxides NPs such as TiO <sub>2</sub> , Fe <sub>2</sub> O <sub>3</sub> , Sb <sub>2</sub> O <sub>3</sub> , ZnO, ZrO <sub>2</sub> , CuO, SiO <sub>2</sub> , and Al <sub>2</sub> O <sub>3</sub><br>CMP wastewater                  | CeO <sub>2</sub> NPs ranging from $23 \times 10^{11} - 9.2 \times 10^{13}$ NP/mL<br>                                                                                                       | Surface confined colorimetric response of ligand-functionalized platform exposed to NPs                                                                                                                        |
| <b>This work</b>       | $4.5 \times 10^{11}$ NP/mL  | $15 \times 10^{11}$ NP/mL   | Responds for CeO <sub>2</sub> NPs                                                                                                                                                                                                                                            | CeO <sub>2</sub> NPs ranging from $(23 - 115) \times 10^{11}$ NP/mL<br>                                                                                                                  | Microarray detection spots created by nanodot printing                                                                                                                                                         |
| <b>Ref<sup>5</sup></b> | 89-1,759 µg/L               | 526-5,864 µg/L              | Responds to both metals (e.g., Ag and Au) and oxide NPs<br>Environmental water (e.g., lake water, NOM) and biological matrices (e.g., artificial urine, mouse serum).                                                                                                        | Wide range of metals (e.g., Ag and Au) and oxide (e.g., CeO <sub>2</sub> , SiO <sub>2</sub> , VO <sub>2</sub> ) NPs with a diameter range of 5 to 400 nm and multiple capping agents.<br> | Solution-based colorimetric method for general NP measurements                                                                                                                                                 |
| <b>Ref<sup>6</sup></b> | 100-1000 µg/L               | ---                         | Measurements of various sizes and shapes of Au nanostructures<br>No real sample demonstrated                                                                                                                                                                                 | Detection varies with various types of NPs<br>                                                                                                                                           | Using changes in the visible absorbance spectra of dyes in aqueous solutions before and after exposure to the NPs                                                                                              |
| <b>Ref<sup>7</sup></b> | 2.0 µg/mL                   | ---                         | Measurements of types of MnO <sub>2</sub> nanosheets<br>Real lake water                                                                                                                                                                                                      | Solution-based naked eye detection<br>                                                                                                                                                    | Detection soluble TMB dye                                                                                                                                                                                      |

**Table S6:** Comparison of the performance characteristics of the different techniques for detection of CeO<sub>2</sub> NPs used in the study.

| Technique/Characteristics | Linear Range (NP/mL)                       | LOD (NP/mL)           | LOQ (NP/mL)           |
|---------------------------|--------------------------------------------|-----------------------|-----------------------|
| Spectroscopic             | $(0.46 - 5.5) \times 10^{11}$              | $0.36 \times 10^{11}$ | $1.2 \times 10^{11}$  |
| Paper sensor              | $23 \times 10^{11} - 9.2 \times 10^{13}$   | $14.9 \times 10^{11}$ | $49.7 \times 10^{11}$ |
| XRF of paper sensor       | $68.7 \times 10^{11} - 4.6 \times 10^{13}$ | $4.7 \times 10^{11}$  | $15.7 \times 10^{11}$ |
| Microarray printing       | $(23 - 115) \times 10^{11}$                | $4.5 \times 10^{11}$  | $15 \times 10^{11}$   |

## REFERENCES

1. Lee, S. S.; Zhu, H.; Contreras, E. Q.; Prakash, A.; Puppala, H. L.; Colvin, V. L., High Temperature Decomposition of Cerium Precursors to Form Ceria Nanocrystal Libraries for Biological Applications. *Chem. Mater.* **2012**, *24* (3), 424-432.
2. Tom, R. T.; Suryanarayanan, V.; Reddy, P. G.; Baskaran, S.; Pradeep, T., Ciprofloxacin-Protected Gold Nanoparticles. *Langmuir* **2004**, *20* (5), 1909-1914.
3. Sehgal, A.; Lalatonne, Y.; Berret, J.-F.; Morvan, M., Precipitation-Redispersion of Cerium Oxide Nanoparticles with Poly (Acrylic Acid): Toward Stable Dispersions. *Langmuir* **2005**, *21* (20), 9359-9364.
4. Zhang, Z.; Yu, L.; Liu, W.; Song, Z., Surface Modification of Ceria Nanoparticles and Their Chemical Mechanical Polishing Behavior on Glass Substrate. *Appl. Surf. Sci.* **2010**, *256* (12), 3856-3861.
5. Corredor, C.; Borysiak, M. D.; Wolfer, J.; Westerhoff, P.; Posner, J. D., Colorimetric Detection of Catalytic Reactivity of Nanoparticles in Complex Matrices. *Environ Sci Technol* **2015**, *49* (6), 3611-3618.
6. Mahmoudi, M.; Lohse, S. E.; Murphy, C. J.; Suslick, K. S., Identification of Nanoparticles with a Colorimetric Sensor Array. *ACS Sensors* **2015**, *1* (1), 17-21.
7. He, Y.; Wang, Z.; Long, D., Direct Visual Detection of MnO<sub>2</sub> Nanosheets within Seconds. *Analytical and Bioanalytical Chemistry* **2016**, *408* (4), 1231-1236.
